# Supplementary material
Source: PubMed Central journal article supplement (PMC8926109)
Supplement: mmc1.pdf [file mmc1.pdf]

## SUPPLEMENTAL APPENDIX (online)

### 2022 ACC Expert Consensus Decision Pathway on Cardiovascular Sequelae of COVID-19 in Adults: Myocarditis and Other Myocardial Involvement, Post-acute Sequelae of SARS-CoV-2 Infection (PASC), and Return to Play

A Report of the American College of Cardiology Solution Set Oversight Committee

---

#### WRITING COMMITTEE

Ty J. Gluckman, MD, MHA, FACC, Co-Chair  
Nicole M. Bhave, MD, FACC, Co-Chair  
Larry A. Allen, MD, MHS, FACC, Vice Chair  
Eugene H. Chung, MD, MSc, FACC, Vice Chair  
Erica S. Spatz, MD, MHS, FACC, Vice Chair

Enrico Ammirati, MD, PhD  
Aaron L. Baggish, MD, FACC  
Biykem Bozkurt, MD, PhD, FACC  
William Cornwell, III, MD  
Kimberly G. Harmon, MD  
Jonathan H. Kim, MD, MSc, FACC  
Anuradha Lala, MD, FACC  
Benjamin D. Levine, MD, FACC

Matthew W. Martinez, MD, FACC  
Oyere Onuma, MD, MSc  
Dermot Phelan, MD, PhD, FACC  
Valentina O. Puntmann, MD, PhD  
Saurabh Rajpal, MD, FACC  
Pam R. Taub, MD, FACC  
Amanda K. Verma, MD, FACC

#### SOLUTION SET OVERSIGHT COMMITTEE

Ty J. Gluckman, MD, MHA, FACC, Chair

|                               |                                                      |
|-------------------------------|------------------------------------------------------|
| Niti R. Aggarwal, MD, FACC    | Dharam J. Kumbhani, MD, SM, FACC                     |
| Nicole M. Bhave, MD, FACC     | Javier A. Sala-Mercado, MD, PhD                      |
| Biykem Bozkurt, MD, PhD, FACC | David E. Winchester, MD, MS, FACC                    |
| Gregory J. Dehmer, MD, MACC   | Megan Coylewright, MD, MPH, FACC – <i>Ex Officio</i> |
| Chayakrit Krittanawong, MD    |                                                      |

## Contents

|                                                                                                         |   |
|---------------------------------------------------------------------------------------------------------|---|
| Supplemental Table 1. Previous return to play recommendations for athletes with recent COVID-19*† ..... | 3 |
| Supplemental Table 2. Previous return to play recommendations for athletes with remote COVID-19...      | 5 |
| Supplemental Table 3: Author Relationships With Industry and Other Entities (Comprehensive).....        | 6 |

Supplemental Table 1. Previous return to play recommendations for athletes with recent COVID-19\*<sup>†</sup>

| Guidance document                                                                             | Asymptomatic                                                                                                                                         | Mild symptoms                                                                                                                                                                                                                      | Moderate symptoms                                                                                                                                                                                                                                                                                                        | Severe symptoms                                                                                                                                                                                                                                                                                              |
|-----------------------------------------------------------------------------------------------|------------------------------------------------------------------------------------------------------------------------------------------------------|------------------------------------------------------------------------------------------------------------------------------------------------------------------------------------------------------------------------------------|--------------------------------------------------------------------------------------------------------------------------------------------------------------------------------------------------------------------------------------------------------------------------------------------------------------------------|--------------------------------------------------------------------------------------------------------------------------------------------------------------------------------------------------------------------------------------------------------------------------------------------------------------|
| <a href="#">Baggish et al.</a><br><br>Applies to athletes                                     | <ul style="list-style-type: none"> <li>• Evaluation by a medical professional</li> <li>• Consider an ECG</li> </ul>                                  | Defined as non-hospitalized <ul style="list-style-type: none"> <li>• Evaluation by a medical professional</li> <li>• ECG</li> </ul>                                                                                                | Defined as moderate to severe <ul style="list-style-type: none"> <li>• Comprehensive evaluation in conjunction with a sports cardiologist</li> <li>• hs-cTn, natriuretic peptide</li> <li>• ECG</li> <li>• Echocardiogram</li> <li>• Exercise stress test</li> <li>• Ambulatory rhythm monitor</li> <li>• CMR</li> </ul> |                                                                                                                                                                                                                                                                                                              |
| <a href="#">Phelan et al.</a><br><br>Applies to competitive athletes and highly active people | <ul style="list-style-type: none"> <li>• No exercise x 2 weeks</li> <li>• Close monitoring</li> <li>• Resumption of exercise over 2 weeks</li> </ul> | Defined as non-hospitalized <ul style="list-style-type: none"> <li>• No exercise while symptomatic</li> <li>• No exercise x 2 weeks after symptom resolution</li> <li>• hs-cTn</li> <li>• ECG</li> <li>• Echocardiogram</li> </ul> | Not addressed                                                                                                                                                                                                                                                                                                            | Defined as hospitalized <ul style="list-style-type: none"> <li>• No exercise while symptomatic</li> <li>• No exercise x 2 weeks after symptom resolution</li> <li>• Evaluation after a minimum of 2 weeks of convalescence</li> <li>• Convalescent cardiac testing if not done while hospitalized</li> </ul> |
| <a href="#">Drezner et al.</a><br><br>Applies to high school athletes                         | Not addressed                                                                                                                                        | Defined as non-hospitalized <ul style="list-style-type: none"> <li>• No exercise x 2 weeks and at least 7 days after symptom resolution</li> <li>• Consider ECG</li> </ul>                                                         |                                                                                                                                                                                                                                                                                                                          | Defined as more severe illness, hospitalization, or ongoing symptoms <ul style="list-style-type: none"> <li>• Comprehensive medical evaluation</li> <li>• Cardiology consultation</li> </ul>                                                                                                                 |

| Guidance document                                                                                    | Asymptomatic                                                                                                                                                                                                                                                                             | Mild symptoms                                                                                                                                                                                                                                                                                                                                                                                                                                      | Moderate symptoms                                                                                                                                                                                                                                                                                 | Severe symptoms                                                                                                                                        |
|------------------------------------------------------------------------------------------------------|------------------------------------------------------------------------------------------------------------------------------------------------------------------------------------------------------------------------------------------------------------------------------------------|----------------------------------------------------------------------------------------------------------------------------------------------------------------------------------------------------------------------------------------------------------------------------------------------------------------------------------------------------------------------------------------------------------------------------------------------------|---------------------------------------------------------------------------------------------------------------------------------------------------------------------------------------------------------------------------------------------------------------------------------------------------|--------------------------------------------------------------------------------------------------------------------------------------------------------|
| <p><a href="#">AMSSM</a></p> <p>Applies to college athletes</p>                                      | <ul style="list-style-type: none"> <li>• No exercise x 10 days</li> <li>• Consider: <ul style="list-style-type: none"> <li>• Medical evaluation</li> <li>• hs-cTn</li> <li>• ECG</li> <li>• Echocardiogram</li> </ul> </li> </ul>                                                        | <p>Defined as common cold-like symptoms without fever</p> <ul style="list-style-type: none"> <li>• No exercise x 14 days or while symptomatic</li> <li>• Consider: <ul style="list-style-type: none"> <li>• Medical evaluation</li> <li>• hs-cTn</li> <li>• ECG</li> <li>• Echocardiogram</li> </ul> </li> </ul>                                                                                                                                   | <p>Defined as flu-like symptoms, fever</p> <ul style="list-style-type: none"> <li>• No exercise x 14 days or while symptomatic</li> <li>• Consider: <ul style="list-style-type: none"> <li>• Medical evaluation</li> <li>• hs-cTn</li> <li>• ECG</li> <li>• Echocardiogram</li> </ul> </li> </ul> | <p>Defined as hospitalized</p> <ul style="list-style-type: none"> <li>• Comprehensive medical evaluation</li> <li>• Cardiology consultation</li> </ul> |
| <p><a href="#">Kim et al.</a></p> <p>Applies to adult athletes in competitive sports<sup>‡</sup></p> | <p>Defined as mild symptoms, including anosmia, ageusia, headache, mild fatigue, mild upper respiratory tract illness, and mild gastrointestinal illness</p> <ul style="list-style-type: none"> <li>• No exercise x 10 days</li> <li>• Slow and graded resumption of activity</li> </ul> | <p>Defined as persistent fever, chills, myalgias, lethargy, dyspnea, and chest tightness; cardiovascular symptoms include dyspnea, exercise intolerance, chest tightness, dizziness, syncope, and palpitations</p> <ul style="list-style-type: none"> <li>• No exercise x 10 days after symptom resolution</li> <li>• Evaluation by a medical professional prior to exercise</li> <li>• hs-cTn</li> <li>• ECG</li> <li>• Echocardiogram</li> </ul> | <p>Defined as hospitalized</p> <ul style="list-style-type: none"> <li>• No exercise while symptomatic</li> <li>• No exercise x 2 weeks after symptom resolution</li> <li>• Evaluation by a medical professional if testing was not done while hospitalized</li> </ul>                             |                                                                                                                                                        |

\* Athlete diagnosed in-season or while training on-site prior to return to full activity.

<sup>†</sup> Initial work-up only; algorithms suggest additional work-up if symptoms recur or persist.

<sup>‡</sup> Other algorithms available for youth sports and masters-level athletes.

AMSSM: American Medical Society for Sports Medicine; CMR: cardiac magnetic resonance imaging; ECG: electrocardiogram; hs-cTn: high-sensitivity cardiac troponin

Supplemental Table 2. Previous return to play recommendations for athletes with remote COVID-19.

| Guidance document                                              | Asymptomatic                                                                             | Mild symptoms | Moderate symptoms                                                                                                                                                                                                                                                                                                                                | Severe symptoms                                                                                                                                                                                                                                                                                                                                                               |
|----------------------------------------------------------------|------------------------------------------------------------------------------------------|---------------|--------------------------------------------------------------------------------------------------------------------------------------------------------------------------------------------------------------------------------------------------------------------------------------------------------------------------------------------------|-------------------------------------------------------------------------------------------------------------------------------------------------------------------------------------------------------------------------------------------------------------------------------------------------------------------------------------------------------------------------------|
| <a href="#">Bhatia et al.</a><br><br>Applies to elite athletes | <ul style="list-style-type: none"> <li>• Medical/pre-participation evaluation</li> </ul> |               | Defined as debilitating illness >7 days and/or symptoms compatible with myocarditis and/or pericarditis such as chest pain, breathlessness, palpitations, exertional dizziness, or syncope, but currently asymptomatic <ul style="list-style-type: none"> <li>• ECG</li> <li>• Echocardiogram</li> <li>• Maximal effort exercise test</li> </ul> | Debilitating symptoms, hospitalized with COVID-19, persistent cardiac symptoms, or reduced performance <ul style="list-style-type: none"> <li>• Cardiology consultation</li> <li>• hs-cTn</li> <li>• ECG</li> <li>• CMR</li> <li>• Consider               <ul style="list-style-type: none"> <li>• ECG monitor</li> <li>• Maximal effort exercise test</li> </ul> </li> </ul> |
| <a href="#">AMSSM</a><br><br>Applies to college athletes       | <ul style="list-style-type: none"> <li>• Medical/pre-participation evaluation</li> </ul> |               |                                                                                                                                                                                                                                                                                                                                                  | <ul style="list-style-type: none"> <li>• Cardiology consultation</li> <li>• ECG</li> <li>• hs-cTn</li> <li>• Echocardiogram</li> <li>• Consider additional testing as indicated</li> </ul>                                                                                                                                                                                    |
| <a href="#">Wilson et al.</a><br><br>Applies to elite athletes | <ul style="list-style-type: none"> <li>• Medical/pre-participation evaluation</li> </ul> |               |                                                                                                                                                                                                                                                                                                                                                  | <ul style="list-style-type: none"> <li>• Cardiology consultation</li> <li>• ECG</li> <li>• 24-hr Holter monitor</li> <li>• CMR</li> <li>• CPET</li> </ul>                                                                                                                                                                                                                     |

CMR: cardiac magnetic resonance imaging; CPET: cardiopulmonary exercise testing; ECG: electrocardiogram; hs-cTn: high-sensitivity cardiac troponin

Supplemental Table 3: Author Relationships With Industry and Other Entities (Comprehensive)—  
2022 ACC Expert Consensus Decision Pathway on Cardiovascular Sequelae of COVID-19 in Adults:  
Myocarditis and Other Myocardial Involvement, Post-acute Sequelae of SARS-CoV-2 Infection  
(PASC), and Return to Play.

| Committee Member                  | Employment                                                                                                                                               | Consultant                                                                                      | Speakers Bureau | Ownership/ Partnership/ Principal                           | Personal Research                                                                                 | Institutional, Organizational, or Other Financial Benefit                                          | Expert Witness                                                                             |
|-----------------------------------|----------------------------------------------------------------------------------------------------------------------------------------------------------|-------------------------------------------------------------------------------------------------|-----------------|-------------------------------------------------------------|---------------------------------------------------------------------------------------------------|----------------------------------------------------------------------------------------------------|--------------------------------------------------------------------------------------------|
| Ty J. Gluckman<br>(Co-Chair)      | Providence Heart Institute<br>Providence St. Joseph Health—<br>Medical Director, Center for Cardiovascular Analytics, Research, and Data Science (CARDS) | <ul style="list-style-type: none"> <li>Knowledge to Practice†</li> <li>Premier, Inc.</li> </ul> | None            | <ul style="list-style-type: none"> <li>Doximity†</li> </ul> | None                                                                                              | None                                                                                               | <ul style="list-style-type: none"> <li>Defendant, Iron Deficiency Anemia, 2021†</li> </ul> |
| Nicole Martin Bhave<br>(Co-Chair) | University of Michigan Medical School—<br>Associate Professor of Medicine<br>Cardiovascular Medicine                                                     | <ul style="list-style-type: none"> <li>Knowledge to Practice†</li> </ul>                        | None            | None                                                        | None                                                                                              | None                                                                                               | None                                                                                       |
| Larry A. Allen<br>(Vice Chair)    | University of Colorado School of Medicine—<br>Professor of                                                                                               | <ul style="list-style-type: none"> <li>Abbott Laboratories</li> <li>ACI Clinical†</li> </ul>    | None            | None                                                        | <ul style="list-style-type: none"> <li>American Heart Association†</li> <li>NIH NHLBI†</li> </ul> | <ul style="list-style-type: none"> <li>Colorado Program for Patient Centered Decisions*</li> </ul> | None                                                                                       |

|                                          |                                                                                                                                                       |                                                                                                                                                                                                                                                                     |      |      |                                                                                                                                      |                                                                                                                                                                                                                                    |      |
|------------------------------------------|-------------------------------------------------------------------------------------------------------------------------------------------------------|---------------------------------------------------------------------------------------------------------------------------------------------------------------------------------------------------------------------------------------------------------------------|------|------|--------------------------------------------------------------------------------------------------------------------------------------|------------------------------------------------------------------------------------------------------------------------------------------------------------------------------------------------------------------------------------|------|
|                                          | Medicine<br>Kenneth Poirier<br>Chair<br>Associate Head<br>for Clinical<br>Affairs,<br>Cardiology<br>Medical<br>Director,<br>Advanced Heart<br>Failure | <ul style="list-style-type: none"> <li>American Heart Association, Circulation: Heart Failure, Associate Editor†</li> <li>Amgen Inc.</li> <li>Boston Scientific†</li> <li>Cytokinetics</li> <li>Medscape</li> <li>Novartis Corporation</li> <li>UpToDate</li> </ul> |      |      | <ul style="list-style-type: none"> <li>PCORI†</li> </ul>                                                                             | <ul style="list-style-type: none"> <li>Janssen Pharmaceuticals, Inc</li> <li>Medtronic Vascular</li> <li>CHAMP-HF, Novartis Corporation‡</li> <li>GUIDE-HF, Abbott Laboratories‡</li> <li>MANAGE-HF, Boston Scientific‡</li> </ul> |      |
| Eugene H. Chung<br><i>(Vice Chair)</i>   | University of Michigan Medical School—<br>Professor of Medicine,<br>Director, Sports Cardiology Clinic                                                | None                                                                                                                                                                                                                                                                | None | None | None                                                                                                                                 | None                                                                                                                                                                                                                               | None |
| Erica Sarah Spatz<br><i>(Vice Chair)</i> | Yale Univ School of Medicine—<br>Associate Professor,<br>Section of Cardiovascular Medicine<br>Director,<br>Preventive Cardiovascular Health Program  | None                                                                                                                                                                                                                                                                | None | None | <ul style="list-style-type: none"> <li>Centers for Medicare and Medicaid Services†</li> <li>Food and Drug Administration†</li> </ul> | None                                                                                                                                                                                                                               | None |
| Enrico Ammirati                          | Niguarda Hospital, Milan, Italy.<br>Cardiologist,<br>Advanced Heart Failure, LVAD                                                                     | <ul style="list-style-type: none"> <li>American Heart Association</li> <li>Circulation: Heart Failure, Associate Editor†</li> <li>Cytokinetics</li> </ul>                                                                                                           | None | None | None                                                                                                                                 | <ul style="list-style-type: none"> <li>Myocarditis Foundation</li> </ul>                                                                                                                                                           | None |

|                  |                                                                                                                                                                                                                                                                                                                                         |                                                                                                                             |      |      |                                                                         |                                                                                                                                                                                                                                                                                  |      |
|------------------|-----------------------------------------------------------------------------------------------------------------------------------------------------------------------------------------------------------------------------------------------------------------------------------------------------------------------------------------|-----------------------------------------------------------------------------------------------------------------------------|------|------|-------------------------------------------------------------------------|----------------------------------------------------------------------------------------------------------------------------------------------------------------------------------------------------------------------------------------------------------------------------------|------|
|                  | and Cardiac Transplant                                                                                                                                                                                                                                                                                                                  |                                                                                                                             |      |      |                                                                         |                                                                                                                                                                                                                                                                                  |      |
| Aaron L. Baggish | Massachusetts General Hospital-- Cardiovascular Performance Program Director                                                                                                                                                                                                                                                            | None                                                                                                                        | None | None | None                                                                    | None                                                                                                                                                                                                                                                                             | None |
| Biykem Bozkurt   | Baylor College of Medicine and DeBakey VA Medical Center Cardiology Department— Mary and Gordon Cain Chair; W.A. “Tex” and Deborah Moncrief, Jr., Chair; Professor of Medicine Medical Care Line Executive, DeBakey VA Medical Center; Director, Winters Center for Heart Failure Research; Associate Director, Cardiovascular Research | <ul style="list-style-type: none"> <li>• Amgen</li> <li>• Relypsa/Vifor Pharma</li> <li>• scPharmaceuticals, Inc</li> </ul> | None | None | <ul style="list-style-type: none"> <li>• LivaNova USA (DSMB)</li> </ul> | <ul style="list-style-type: none"> <li>• Abbott Laboratories†</li> <li>• ACC/AHA Task Force for Data Standards*</li> <li>• ACC/AHA Task Force for Performance Measures*</li> <li>• Circulation</li> <li>• Heart Failure Society of America, Immediate Past President*</li> </ul> | None |



|                       |                                                                                                                                           |      |      |      |                                                                     |                                                                                                                                                                     |      |
|-----------------------|-------------------------------------------------------------------------------------------------------------------------------------------|------|------|------|---------------------------------------------------------------------|---------------------------------------------------------------------------------------------------------------------------------------------------------------------|------|
|                       | Institute; Vice-Chair of Medicine, Baylor College of Medicine                                                                             |      |      |      |                                                                     |                                                                                                                                                                     |      |
| William Cornwell, III | University of Colorado Anschutz Medical Campus—Cardiologist, Advanced Heart Failure, LVAD and Cardiac Transplant                          | None | None | None | None                                                                | None                                                                                                                                                                | None |
| Kimberly G. Harmon    | University of Washington—Team Physician                                                                                                   | None | None | None | None                                                                | <ul style="list-style-type: none"> <li>• 98point6*</li> </ul>                                                                                                       | None |
| Jonathan H. Kim       | Emory Clinical Cardiovascular Research Institute, Emory School of Medicine—Associate Professor of Medicine, Director of Sports Cardiology | None | None | None | None                                                                | None                                                                                                                                                                | None |
| Anuradha Lala         | Icahn School of Medicine at Mount Sinai—Associate Professor, Cardiology & Population                                                      | None | None | None | <ul style="list-style-type: none"> <li>• Susquana (DSMB)</li> </ul> | <ul style="list-style-type: none"> <li>• Bioventrix*</li> <li>• Zoll*</li> <li>• HEART-FID, American Regent‡</li> <li>• PARAGLIDE, Novartis Corporation‡</li> </ul> | None |

|                     |                                                                                                                                                                                                                                                 |                                                                                                     |      |                                                                |      |                                                                     |      |
|---------------------|-------------------------------------------------------------------------------------------------------------------------------------------------------------------------------------------------------------------------------------------------|-----------------------------------------------------------------------------------------------------|------|----------------------------------------------------------------|------|---------------------------------------------------------------------|------|
|                     | Health Science; Program Director, Advanced HF & Transplant Fellowship                                                                                                                                                                           |                                                                                                     |      |                                                                |      | <ul style="list-style-type: none"> <li>TRANSFORM, NHLBI†</li> </ul> |      |
| Benjamin D. Levine  | Institute for Exercise & Environmental Medicine— Director; Texas Health Presbyterian Dallas—Chair for Wellness and Chair for Cardiovascular Research; The University of Texas Southwestern Medical Center— Professor of Medicine and Cardiology | None                                                                                                | None | <ul style="list-style-type: none"> <li>Amgen Inc. †</li> </ul> | None | None                                                                | None |
| Matthew M. Martinez | Morristown Medical Center —Director, Sports Cardiology and Hypertrophic Cardiomyopathy center                                                                                                                                                   | <ul style="list-style-type: none"> <li>Bristol Myers Squibb</li> <li>Major League Soccer</li> </ul> | None | None                                                           | None | None                                                                | None |
| Oyere Onuma         | Yale University School of Medicine— Assistant                                                                                                                                                                                                   | None                                                                                                | None | None                                                           | None | None                                                                | None |

|                    |                                                                                                                          |                                                                                                                                                                                         |                                                                     |                                                                  |      |                                                                                       |      |
|--------------------|--------------------------------------------------------------------------------------------------------------------------|-----------------------------------------------------------------------------------------------------------------------------------------------------------------------------------------|---------------------------------------------------------------------|------------------------------------------------------------------|------|---------------------------------------------------------------------------------------|------|
|                    | Professor of Cardiology                                                                                                  |                                                                                                                                                                                         |                                                                     |                                                                  |      |                                                                                       |      |
| Dermot Phelan      | Sanger Heart and Vascular Institute, Atrium Health— Director of Sports Cardiology                                        | <ul style="list-style-type: none"> <li>• Bristol Myers Squibb</li> </ul>                                                                                                                | None                                                                | None                                                             | None | None                                                                                  | None |
| Valentina Puntmann | University Hospital Frankfurt— Associate Professor Consultant Cardiologist (Cardiovascular Magnetic Resonance Imaging)   | <ul style="list-style-type: none"> <li>• Bayer AG</li> <li>• CMR International</li> </ul>                                                                                               | None                                                                | None                                                             | None | None                                                                                  | None |
| Saurabh Rajpal     | The Ohio State University Wexner Medical Center— Assistant Professor                                                     | None                                                                                                                                                                                    | <ul style="list-style-type: none"> <li>• Simply Speaking</li> </ul> | None                                                             | None | <ul style="list-style-type: none"> <li>• ADAPT Trial, United Therapeutics‡</li> </ul> | None |
| Pam R. Taub        | University of California San Diego Medical Ctr— Professor of Medicine; Director of Step Family Foundation Cardiovascular | <ul style="list-style-type: none"> <li>• Amgen</li> <li>• Boehringer Ingelheim Pharmaceuticals, Inc†</li> <li>• Esperion†</li> <li>• Medtronic</li> <li>• Novo Nordisk Inc.†</li> </ul> | None                                                                | <ul style="list-style-type: none"> <li>• Epirium Bio*</li> </ul> | None | None                                                                                  | None |

|              |                                                                                                                                                                    |                                                                    |      |      |      |      |      |
|--------------|--------------------------------------------------------------------------------------------------------------------------------------------------------------------|--------------------------------------------------------------------|------|------|------|------|------|
|              | Rehabilitation and Wellness Center                                                                                                                                 | <ul style="list-style-type: none"> <li>• Sanofi-Aventis</li> </ul> |      |      |      |      |      |
| Amanda Verma | Washington University School of Medicine-- Assistant Professor of Medicine, Advanced Heart Failure and Transplant Cardiology; Director of COVID Cardiology Clinics | None                                                               | None | None | None | None | None |

This table represents ALL relationships of committee members with industry and other entities that were reported by authors, including those not deemed to be relevant to this document, at the time this document was under development. The table does not necessarily reflect relationships with industry at the time of publication. A person is deemed to have a significant interest in a business if the interest represents ownership of ≥5% of the voting stock or share of the business entity, or ownership of ≥\$5,000 of the fair market value of the business entity or if funds received by the person from the business entity exceed 5% of the person's gross income for the previous year. Relationships that exist with no financial benefit are also included for the purpose of transparency. Relationships in this table are modest unless otherwise noted. Please refer to <http://www.acc.org/guidelines/about-guidelines-and-clinical-documents/relationships-with-industry-policy> for definitions of disclosure categories or additional information about the ACC Disclosure Policy for Writing Committees.

\* No financial benefit.

† Significant relationship

‡ This disclosure was entered under the Clinical Trial Enroller category in the ACC's disclosure system. To appear in this category, the author acknowledges that there is no direct or institutional relationship with the trial sponsor as defined in the ACC Disclosure Policy for Writing Committees.
